# Supplementary material for: High performance NaxCoO2 as a cathode material for rechargeable sodium batteries
Source: Royal Society of Chemistry journal article supplement (doi:10.1039/c5ta03173g), 2015-01-01
Supplement: c5ta03173g1.pdf [file c5ta03173g1.pdf]

## High Performing $\text{Na}_x\text{CoO}_2$ as a Cathode material for Rechargeable Sodium Batteries

B Venkata Rami Reddy, R Ravikumar, C Nithya and S Gopukumar

### Electronic supplementary information

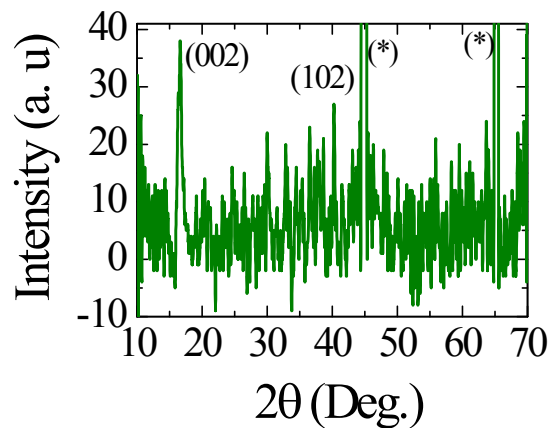

Fig. S1. XRD Pattern of  $\text{Na}_x\text{CoO}_2$  electrode after cycling, Al peaks due to the current collector of the electrode are indexed with (\*).

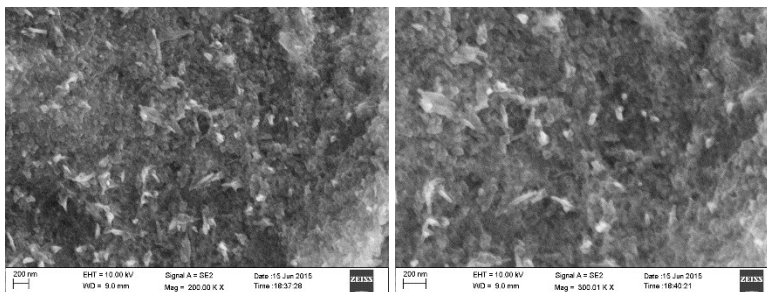

Fig. S2.  
FESEM images  
of  $\text{Na}_x\text{CoO}_2$   
electrode after  
cycling.

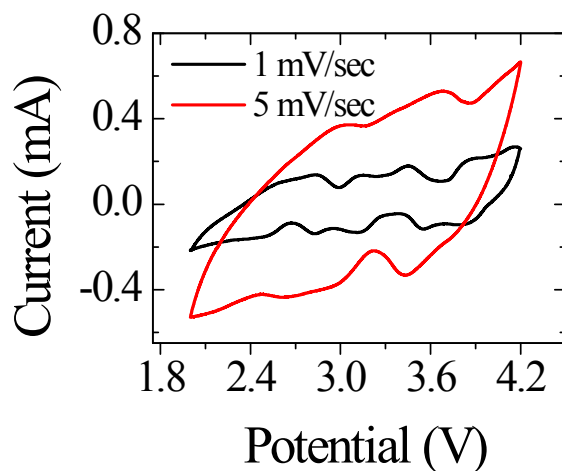

**Fig. S3. CV of  $\text{Na}_x\text{CoO}_2$  at different scan rates (1  $\text{mV}$  and 5  $\text{mVs}^{-1}$ ).**

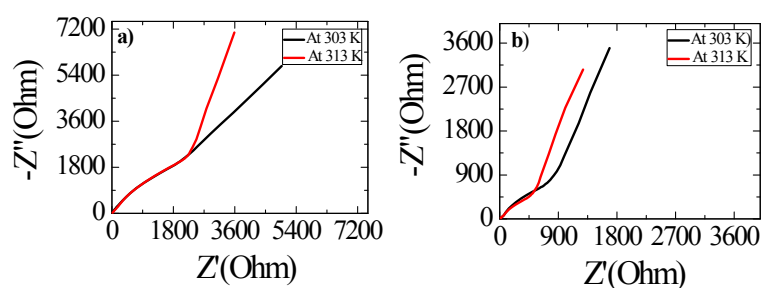

**Fig. S4.  
Nyquist plot of  
the cell  
measured at  
two different  
temperatures,  
(a) Before  
cycling, (b)  
After cycling.**

#### **XPS studies**

The various binding energy values have been presented based on the earlier reports (online library-

<http://techdb.podzone.net/>).  $\text{Co}^{3+}$  corresponds to the binding energy value 780 eV (779.7-708.3eV),  $\text{Co}^{2+}$  corresponds to 780.2 eV (780.1-780.3 eV) and  $\text{Co}^0$  corresponds to 778.2 eV (778.1-778.3.3 eV).

Further, it is very difficult to distinguish the oxidation state of Co by XPS. However, recently reports (ref: 26) the  $\text{Co}^{3+}$  to  $\text{Co}^{4+}$  conversion during charge/discharge process has been explained by XPS study. Whereas, the prepared material exhibits the  $\text{Co}2p_{3/2}$  binding energy value at 779.8 eV, which is very close to standard database value of  $\text{Co}^{3+}$ . Thus, we confirm that, in  $\text{Na}_x\text{CoO}_2$ , Co is exist in +3 oxidation state.
